# Supplementary material for: Hybrid mesoporous colloid photonic crystal array for high performance vapor sensing
Source: Royal Society of Chemistry journal article supplement (doi:10.1039/c4nr00361f), 2014-01-01
Supplement: c4nr00361f1.pdf [file c4nr00361f1.pdf]

Cite this: DOI: 10.1039/c0xx00000x

## Supporting Information

www.rsc.org/xxxxxx

### Hybrid Mesoporous Colloid Photonic Crystals Array for High Performance Vapor Sensing†

Ling Bai,<sup>a</sup> ZhuoYing Xie,<sup>\*a,b</sup> Kaidi Cao,<sup>a</sup> Wei Wang,<sup>a</sup> YuanJin Zhao,<sup>a</sup> Hua Xu,<sup>a</sup> Cun Zhu,<sup>a</sup> Zhongde Mu,<sup>a</sup> Qifeng Zhong<sup>a</sup> and Zhongze Gu,<sup>\*a,b</sup>

5 Received (in XXX, XXX) Xth XXXXXXXXXX 20XX, Accepted Xth XXXXXXXXXX 20XX

DOI: 10.1039/b000000x

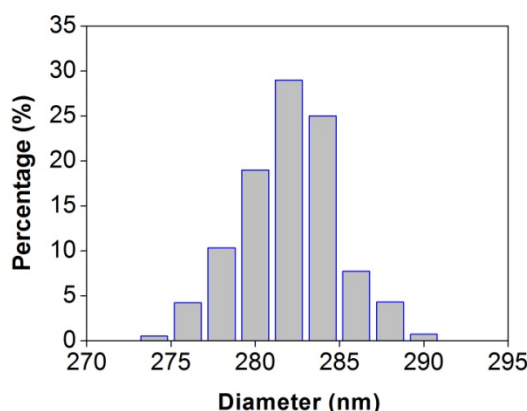

**Fig. S1** Particle size distribution of MSNs chosen for fabrications of PCs. The mean diameter of the MSNs was 283nm, and the CV was 4.2 %, determined from measurement of more than 100 particles in several TEM figures.

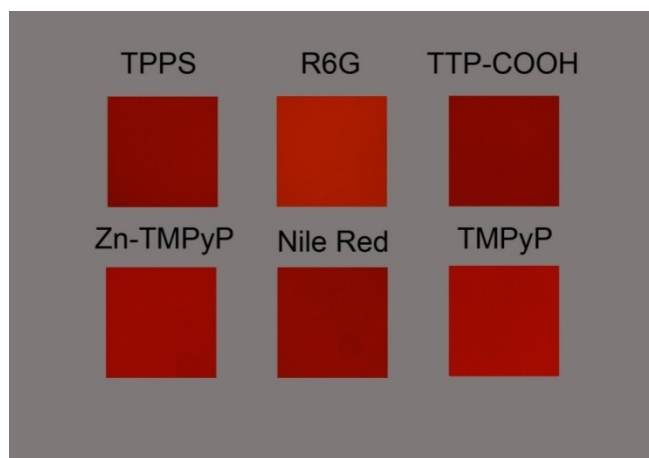

**Fig. S2** Fluorescence images of MCPC sensor array.

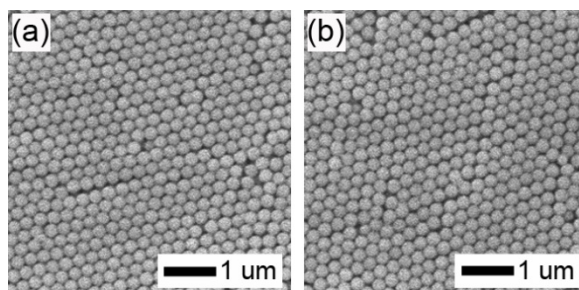

**Fig. S3** Comparing SEM figures of MSNs PC films before and after modification. 4a: before modification, 4b: after modification.

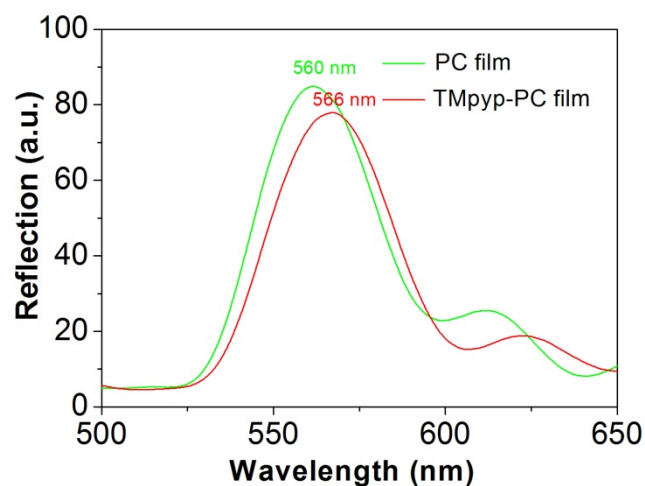

**5 Fig. S4** Comparing Reflection spectra of MSNs PC films before and after modifications in  $N_2$ .

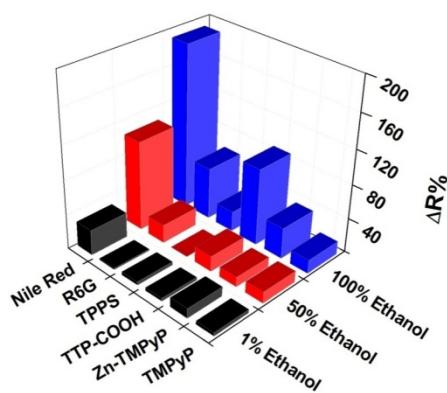

**Fig. S5.** Average response of three trials of the sensor array to ethanol vapors at different partial pressures at 298K.

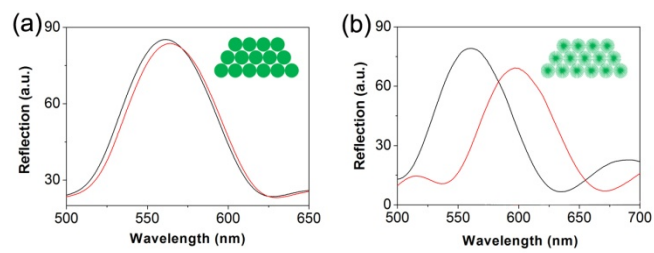

**Fig. S6** Comparing wavelength shifts of solid PC film and MCPC film upon exposure to saturated ethanol. (a) solid PC film, (b) MCPC film.
